# Supplementary material for: Investigating the Relationship between Perceived Meal Colour Variety and Food Intake across Meal Types in a Smartphone-Based Ecological Momentary Assessment
Source: PubMed Central journal article supplement (PMC7996926; doi:10.3390/nu13030755), 2021-02-26
Supplement: nutrients-13-00755-s001.pdf [file nutrients-13-00755-s001.pdf]

**Table S1.** Intraclass Correlations (ICC) for all food groups.

| Food group          | Type                    |                           | Interpretation according to Cicchetti (1994) |
|---------------------|-------------------------|---------------------------|----------------------------------------------|
|                     | Agreement<br><i>ICC</i> | Consistency<br><i>ICC</i> |                                              |
| Vegetables          | .79                     | .80                       | Excellent                                    |
| Fruit               | .92                     | .92                       | Excellent                                    |
| Grains and starches | .79                     | .79                       | Excellent                                    |
| Protein             | .85                     | .85                       | Excellent                                    |
| Dairy               | .66                     | .67                       | Good                                         |
| Fats and oils       | .50                     | .51                       | Fair                                         |
| Sugary extras       | .82                     | .83                       | Excellent                                    |

**Table S2.** Results of the multilevel models to analyse the relationship between perceived meal colour variety and the consumption of seven food groups across meal types.

| Predictor                                         | Random slopes model (fixed effects) |           |          |           |          | Random intercept model (fixed effects) |           |          |           |          |
|---------------------------------------------------|-------------------------------------|-----------|----------|-----------|----------|----------------------------------------|-----------|----------|-----------|----------|
|                                                   | <i>b</i>                            | <i>SE</i> | <i>t</i> | <i>df</i> | <i>p</i> | <i>b</i>                               | <i>SE</i> | <i>t</i> | <i>df</i> | <i>p</i> |
| <i>Model 1: proportion of vegetables</i>          |                                     |           |          |           |          |                                        |           |          |           |          |
| Intercept                                         | 0.141                               | 0.006     | 22.51    | 103.05    | < .001   | 0.141                                  | 0.006     | 22.59    | 103.170   | < .001   |
| Perceived meal colour variety                     | 0.003                               | 0.000     | 15.60    | 85.44     | < .001   | 0.003                                  | 0.000     | 21.18    | 2705.93   | < .001   |
| <i>Model 2: proportion of fruit</i>               |                                     |           |          |           |          |                                        |           |          |           |          |
| Intercept                                         | 0.137                               | 0.009     | 15.24    | 101.14    | < .001   | 0.138                                  | 0.009     | 15.43    | 97.41     | < .001   |
| Perceived meal colour variety                     | -0.002                              | 0.000     | -7.39    | 117.26    | < .001   | -0.003                                 | 0.000     | -11.08   | 2699.49   | < .001   |
| <i>Model 3: proportion of grains and starches</i> |                                     |           |          |           |          |                                        |           |          |           |          |
| Intercept                                         | 0.299                               | 0.008     | 36.70    | 102.68    | < .001   | 0.298                                  | 0.008     | 36.61    | 102.74    | < .001   |
| Perceived meal colour variety                     | 0.001                               | 0.000     | 3.36     | 84.94     | < .001   | 0.001                                  | 0.000     | 5.60     | 2706.51   | < .001   |
| <i>Model 4: proportion of protein</i>             |                                     |           |          |           |          |                                        |           |          |           |          |
| Intercept                                         | 0.081                               | 0.006     | 14.28    | 104.11    | < .001   | 0.081                                  | 0.006     | 14.36    | 103.46    | < .001   |
| Perceived meal colour variety                     | 0.002                               | 0.000     | 10.02    | 147.57    | < .001   | 0.001                                  | 0.000     | 11.39    | 2704.20   | < .001   |
| <i>Model 5: proportion of dairy</i>               |                                     |           |          |           |          |                                        |           |          |           |          |
| Intercept                                         | 0.125                               | 0.006     | 19.77    | 111.82    | < .001   | 0.125                                  | 0.006     | 19.77    | 112.08    | < .001   |
| Perceived meal colour variety                     | 0.000                               | 0.000     | 1.16     | 79.99     | .250     | 0.000                                  | 0.000     | 1.50     | 2714.38   | .135     |
| <i>Model 6: proportion of fats and oils</i>       |                                     |           |          |           |          |                                        |           |          |           |          |
| Intercept                                         | 0.044                               | 0.004     | 10.36    | 104.96    | < .001   | 0.044                                  | 0.004     | 10.40    | 105.08    | < .001   |
| Perceived meal colour variety                     | 0.000                               | 0.000     | 1.67     | 84.54     | .099     | 0.000                                  | 0.000     | 2.90     | 2707.90   | .004     |
| <i>Model 7: proportion of sugary extras</i>       |                                     |           |          |           |          |                                        |           |          |           |          |
| Intercept                                         | 0.173                               | 0.010     | 17.44    | 117.99    | < .001   | 0.173                                  | 0.010     | 17.58    | 116.47    | < .001   |
| Perceived meal colour variety                     | -0.004                              | 0.000     | -11.97   | 135.99    | < .001   | -0.004                                 | 0.000     | -15.43   | 2719.09   | < .001   |

**Table S3.** Results of the multilevel models to analyse the relationship between perceived meal colour variety and the consumption of seven food groups for breakfast.

| Predictor                                         | Random slopes model (fixed effects) |           |          |           |          | Random intercept model (fixed effects) |           |          |           |          |
|---------------------------------------------------|-------------------------------------|-----------|----------|-----------|----------|----------------------------------------|-----------|----------|-----------|----------|
|                                                   | <i>b</i>                            | <i>SE</i> | <i>t</i> | <i>df</i> | <i>p</i> | <i>b</i>                               | <i>SE</i> | <i>t</i> | <i>df</i> | <i>p</i> |
| <i>Model 1: proportion of vegetables</i>          |                                     |           |          |           |          |                                        |           |          |           |          |
| Intercept                                         | 0.036                               | 0.006     | 6.24     | 89.05     | < .001   | 0.037                                  | 0.006     | 6.60     | 94.76     | < .001   |
| Perceived meal colour variety                     | 0.001                               | 0.000     | 4.83     | 74.29     | < .001   | 0.001                                  | 0.000     | 5.98     | 701.11    | < .001   |
| <i>Model 2: proportion of fruit</i>               |                                     |           |          |           |          |                                        |           |          |           |          |
| Intercept                                         | 0.163                               | 0.015     | 11.04    | 97.69     | < .001   | 0.162                                  | 0.015     | 10.87    | 101.33    | < .001   |
| Perceived meal colour variety                     | 0.000                               | 0.000     | 0.60     | 79.71     | .553     | 0.000                                  | 0.001     | 0.53     | 696.49    | .599     |
| <i>Model 3: proportion of grains and starches</i> |                                     |           |          |           |          |                                        |           |          |           |          |
| Intercept                                         | 0.371                               | 0.014     | 26.01    | 96.61     | < .001   | 0.371                                  | 0.016     | 23.91    | 100.85    | < .001   |
| Perceived meal colour variety                     | -0.002                              | 0.001     | -2.99    | 57.14     | .004     | -0.002                                 | 0.001     | -3.56    | 697.68    | < .001   |
| <i>Model 4: proportion of protein</i>             |                                     |           |          |           |          |                                        |           |          |           |          |
| Intercept                                         | 0.066                               | 0.010     | 6.90     | 105.86    | < .001   | 0.064                                  | 0.009     | 7.32     | 113.72    | < .001   |
| Perceived meal colour variety                     | 0.002                               | 0.000     | 4.63     | 117.06    | < .001   | 0.002                                  | 0.000     | 6.13     | 699.42    | < .001   |
| <i>Model 5: proportion of dairy</i>               |                                     |           |          |           |          |                                        |           |          |           |          |
| Intercept                                         | 0.190                               | 0.012     | 16.48    | 103.37    | < .001   | 0.188                                  | 0.012     | 15.76    | 104.57    | < .001   |
| Perceived meal colour variety                     | -0.000                              | 0.001     | -0.73    | 72.77     | .469     | -0.000                                 | 0.000     | -0.96    | 701.99    | .339     |
| <i>Model 6: proportion of fats and oils</i>       |                                     |           |          |           |          |                                        |           |          |           |          |
| Intercept                                         | 0.027                               | 0.005     | 5.72     | 124.66    | < .001   | 0.026                                  | 0.004     | 5.95     | 139.28    | < .001   |
| Perceived meal colour variety                     | 0.000                               | 0.000     | 2.14     | 130.72    | .034     | 0.001                                  | 0.000     | 2.82     | 701.78    | .005     |
| <i>Model 7: proportion of sugary extras</i>       |                                     |           |          |           |          |                                        |           |          |           |          |
| Intercept                                         | 0.148                               | 0.014     | 10.75    | 96.41     | < .001   | 0.151                                  | 0.015     | 10.34    | 88.25     | < .001   |
| Perceived meal colour variety                     | -0.002                              | 0.001     | -3.21    | 123.65    | .002     | -0.002                                 | 0.001     | -2.82    | 701.90    | .005     |

**Table S4.** Results of the multilevel models to analyse the relationship between perceived meal colour variety and the consumption of seven food groups for lunch.

| Predictor                                         | Random slopes model (fixed effects) |           |          |           |          | Random intercept model (fixed effects) |           |          |           |          |
|---------------------------------------------------|-------------------------------------|-----------|----------|-----------|----------|----------------------------------------|-----------|----------|-----------|----------|
|                                                   | <i>b</i>                            | <i>SE</i> | <i>t</i> | <i>df</i> | <i>p</i> | <i>b</i>                               | <i>SE</i> | <i>t</i> | <i>df</i> | <i>p</i> |
| <i>Model 1: proportion of vegetables</i>          |                                     |           |          |           |          |                                        |           |          |           |          |
| Intercept                                         | 0.259                               | 0.016     | 16.64    | 95.58     | < .001   | 0.258                                  | 0.014     | 18.86    | 127.20    | < .001   |
| Perceived meal colour variety                     | 0.002                               | 0.001     | 4.21     | 78.94     | < .001   | 0.002                                  | 0.000     | 4.94     | 554.47    | < .001   |
| <i>Model 2: proportion of fruit</i>               |                                     |           |          |           |          |                                        |           |          |           |          |
| Intercept                                         | 0.026                               | 0.007     | 3.73     | 90.60     | < .001   | 0.027                                  | 0.006     | 4.95     | 98.70     | < .001   |
| Perceived meal colour variety                     | -0.000                              | 0.000     | -0.85    | 74.37     | .396     | -0.000                                 | 0.000     | -0.71    | 561.91    | .476     |
| <i>Model 3: proportion of grains and starches</i> |                                     |           |          |           |          |                                        |           |          |           |          |
| Intercept                                         | 0.391                               | 0.017     | 23.38    | 99.20     | < .001   | 0.391                                  | 0.015     | 25.46    | 127.61    | < .001   |
| Perceived meal colour variety                     | -0.001                              | 0.000     | -2.72    | 70.69     | .008     | -0.001                                 | 0.000     | -2.71    | 548.37    | .007     |
| <i>Model 4: proportion of protein</i>             |                                     |           |          |           |          |                                        |           |          |           |          |
| Intercept                                         | 0.117                               | 0.011     | 10.73    | 93.60     | < .001   | 0.116                                  | 0.010     | 11.35    | 135.65    | < .001   |
| Perceived meal colour variety                     | 0.000                               | 0.000     | 0.03     | 278.22    | .973     | 0.000                                  | 0.000     | 0.19     | 557.53    | .853     |
| <i>Model 5: proportion of dairy</i>               |                                     |           |          |           |          |                                        |           |          |           |          |
| Intercept                                         | 0.128                               | 0.012     | 10.69    | 97.58     | < .001   | 0.129                                  | 0.010     | 12.75    | 139.50    | < .001   |
| Perceived meal colour variety                     | -0.001                              | 0.000     | -2.06    | 77.48     | .043     | -0.001                                 | 0.000     | -2.65    | 563.42    | .008     |
| <i>Model 6: proportion of fats and oils</i>       |                                     |           |          |           |          |                                        |           |          |           |          |
| Intercept                                         | 0.053                               | 0.007     | 7.74     | 92.64     | < .001   | 0.053                                  | 0.007     | 7.41     | 143.73    | < .001   |
| Perceived meal colour variety                     | 0.000                               | 0.000     | 1.33     | 72.84     | .187     | 0.000                                  | 0.000     | 1.41     | 563.69    | .158     |
| <i>Model 7: proportion of sugary extras</i>       |                                     |           |          |           |          |                                        |           |          |           |          |
| Intercept                                         | 0.025                               | 0.006     | 3.92     | 110.11    | < .001   | 0.025                                  | 0.007     | 3.65     | 165.94    | < .001   |
| Perceived meal colour variety                     | -0.000                              | 0.000     | -0.66    | 122.33    | .510     | -0.000                                 | 0.000     | -1.06    | 563.22    | .290     |

**Table S5.** Results of the multilevel models to analyse the relationship between perceived meal colour variety and the consumption of seven food groups for dinner.

| Predictor                                         | Random slopes model (fixed effects) |           |          |           |          | Random intercept model (fixed effects) |           |          |           |          |
|---------------------------------------------------|-------------------------------------|-----------|----------|-----------|----------|----------------------------------------|-----------|----------|-----------|----------|
|                                                   | <i>b</i>                            | <i>SE</i> | <i>t</i> | <i>df</i> | <i>p</i> | <i>b</i>                               | <i>SE</i> | <i>t</i> | <i>df</i> | <i>p</i> |
| <i>Model 1: proportion of vegetables</i>          |                                     |           |          |           |          |                                        |           |          |           |          |
| Intercept                                         | 0.230                               | 0.013     | 17.09    | 106.114   | < .001   | 0.232                                  | 0.013     | 17.43    | 123.57    | < .001   |
| Perceived meal colour variety                     | 0.003                               | 0.000     | 5.41     | 85.99     | < .001   | 0.002                                  | 0.000     | 6.06     | 660.00    | < .001   |
| <i>Model 2: proportion of fruit</i>               |                                     |           |          |           |          |                                        |           |          |           |          |
| Intercept                                         | 0.034                               | 0.008     | 4.32     | 108.31    | < .001   | 0.034                                  | 0.008     | 4.52     | 98.01     | < .001   |
| Perceived meal colour variety                     | -0.000                              | 0.000     | -1.48    | 147.43    | .142     | -0.000                                 | 0.000     | -1.34    | 635.87    | .182     |
| <i>Model 3: proportion of grains and starches</i> |                                     |           |          |           |          |                                        |           |          |           |          |
| Intercept                                         | 0.373                               | 0.014     | 26.44    | 106.78    | < .001   | 0.367                                  | 0.013     | 28.17    | 124.66    | < .001   |
| Perceived meal colour variety                     | -0.002                              | 0.001     | -3.91    | 75.93     | < .001   | -0.002                                 | 0.000     | -4.07    | 670.79    | < .001   |
| <i>Model 4: proportion of protein</i>             |                                     |           |          |           |          |                                        |           |          |           |          |
| Intercept                                         | 0.131                               | 0.011     | 11.91    | 106.18    | < .001   | 0.131                                  | 0.011     | 11.81    | 122.93    | < .001   |
| Perceived meal colour variety                     | 0.001                               | 0.000     | 2.31     | 589.23    | .021     | 0.001                                  | 0.000     | 2.28     | 660.74    | .023     |
| <i>Model 5: proportion of dairy</i>               |                                     |           |          |           |          |                                        |           |          |           |          |
| Intercept                                         | 0.128                               | 0.011     | 11.95    | 105.51    | < .001   | 0.129                                  | 0.010     | 12.96    | 126.45    | < .001   |
| Perceived meal colour variety                     | -0.000                              | 0.000     | -0.05    | 172.87    | .958     | -0.000                                 | 0.000     | -0.41    | 666.83    | .686     |
| <i>Model 6: proportion of fats and oils</i>       |                                     |           |          |           |          |                                        |           |          |           |          |
| Intercept                                         | 0.050                               | 0.007     | 6.85     | 121.83    | < .001   | 0.050                                  | 0.007     | 7.08     | 135.31    | < .001   |
| Perceived meal colour variety                     | 0.000                               | 0.000     | 1.69     | 67.13     | .096     | 0.000                                  | 0.000     | 1.71     | 673.67    | .087     |
| <i>Model 7: proportion of sugary extras</i>       |                                     |           |          |           |          |                                        |           |          |           |          |
| Intercept                                         | 0.053                               | 0.011     | 4.75     | 112.66    | < .001   | 0.056                                  | 0.009     | 6.07     | 138.24    | < .001   |
| Perceived meal colour variety                     | -0.001                              | 0.000     | -2.82    | 127.93    | .006     | -0.001                                 | 0.000     | -4.54    | 675.60    | < .001   |

**Table S6.** Results of the multilevel models to analyse the relationship between perceived meal colour variety and the consumption of seven food groups as snacks.

| Predictor                                         | Random slopes model (fixed effects) |           |          |           |          | Random intercept model (fixed effects) |           |          |           |          |
|---------------------------------------------------|-------------------------------------|-----------|----------|-----------|----------|----------------------------------------|-----------|----------|-----------|----------|
|                                                   | <i>b</i>                            | <i>SE</i> | <i>t</i> | <i>df</i> | <i>p</i> | <i>b</i>                               | <i>SE</i> | <i>t</i> | <i>df</i> | <i>p</i> |
| <i>Model 1: proportion of vegetables</i>          |                                     |           |          |           |          |                                        |           |          |           |          |
| Intercept                                         | 0.057                               | 0.009     | 6.56     | 76.17     | < .001   | 0.058                                  | 0.008     | 7.51     | 169.10    | < .001   |
| Perceived meal colour variety                     | 0.001                               | 0.000     | 3.27     | 82.37     | .002     | 0.001                                  | 0.000     | 4.14     | 763.35    | < .001   |
| <i>Model 2: proportion of fruit</i>               |                                     |           |          |           |          |                                        |           |          |           |          |
| Intercept                                         | 0.293                               | 0.025     | 11.96    | 67.02     | < .001   | 0.290                                  | 0.025     | 11.74    | 131.98    | < .001   |
| Perceived meal colour variety                     | -0.002                              | 0.001     | -1.83    | 48.00     | .073     | -0.002                                 | 0.001     | -2.40    | 763.47    | .016     |
| <i>Model 3: proportion of grains and starches</i> |                                     |           |          |           |          |                                        |           |          |           |          |
| Intercept                                         | 0.181                               | 0.017     | 10.66    | 70.02     | < .001   | 0.176                                  | 0.015     | 12.07    | 132.71    | < .001   |
| Perceived meal colour variety                     | 0.003                               | 0.001     | 3.66     | 68.89     | < .001   | 0.002                                  | 0.001     | 4.11     | 764.76    | < .001   |
| <i>Model 4: proportion of protein</i>             |                                     |           |          |           |          |                                        |           |          |           |          |
| Intercept                                         | 0.040                               | 0.009     | 4.41     | 39.97     | < .001   | 0.036                                  | 0.006     | 5.83     | 88.10     | < .001   |
| Perceived meal colour variety                     | 0.001                               | 0.000     | 3.46     | 31.93     | .002     | 0.001                                  | 0.000     | 4.23     | 752.30    | < .001   |
| <i>Model 5: proportion of dairy</i>               |                                     |           |          |           |          |                                        |           |          |           |          |
| Intercept                                         | 0.088                               | 0.012     | 7.17     | 60.86     | < .001   | 0.087                                  | 0.012     | 7.55     | 105.59    | < .001   |
| Perceived meal colour variety                     | 0.001                               | 0.000     | 1.69     | 31.52     | .101     | 0.001                                  | 0.000     | 1.72     | 760.32    | .086     |
| <i>Model 6: proportion of fats and oils</i>       |                                     |           |          |           |          |                                        |           |          |           |          |
| Intercept                                         | 0.041                               | 0.010     | 4.08     | 110.26    | < .001   | 0.041                                  | 0.011     | 3.61     | 112.70    | < .001   |
| Perceived meal colour variety                     | -0.001                              | 0.000     | -1.57    | 145.77    | .118     | -0.000                                 | 0.000     | -1.51    | 754.44    | .132     |
| <i>Model 7: proportion of sugary extras</i>       |                                     |           |          |           |          |                                        |           |          |           |          |
| Intercept                                         | 0.302                               | 0.025     | 11.88    | 78.54     | < .001   | 0.315                                  | 0.024     | 12.87    | 138.16    | < .001   |
| Perceived meal colour variety                     | -0.003                              | 0.001     | -3.18    | 51.07     | .002     | -0.002                                 | 0.001     | -2.96    | 764.32    | .003     |
